# Supplementary material
Source: PubMed Central journal article supplement (PMC3225955)
Supplement: NIHMS36851-supplement-2.pdf [file NIHMS36851-supplement-2.pdf]

Supplementary Table 1. Oligonucleotide primers in this study

| Name        | Ori | Primer sequence (5'- 3')                 | Method           |
|-------------|-----|------------------------------------------|------------------|
| MYB1        | For | GGCAGAAATCGCAAAGCTAC                     | RT-PCR (Exon5)   |
| MYB2        | For | GCAGGATGTGATCAAACAGG                     | RT-PCR (Exon13)  |
| NFIB1       | Rev | CTATTTCCCAGCGGACTTCA                     | RT-PCR (Exon12)  |
| MYB3        | For | CTCCGCCTACAGCTCAACTC                     | RT-PCR (Exon6)   |
| MYB4        | For | GCACCAGCATCAGAAGATGA                     | RT-PCR (Exon15)  |
| NFIB3       | Rev | TCAGTTGCTTGTTTCTGCTTGAAGG                | RT-PCR (Exon12)  |
| ACTB-F      | For | CTGTCTGGCGGCACCACCAT                     | RT-PCR           |
| ACTB-R      | Rev | GCAACTAAGTCATAGTCCGC                     | RT-PCR           |
| MYB-QE2     | For | GACTATGGATGGGCTGCTTCC                    | QRT-PCR (Exon2)  |
| MYB-QE3     | Rev | TGTTCCATTCTGTTCCACCA                     | QRT-PCR (Exon3)  |
| MYB-QE15    | For | GCATTTACAGTACCTAAAAACAGGTC               | QRT-PCR (Exon15) |
| MYB-QE16    | Rev | CCCAAGTCAACTTGAAGTGTTT                   | QRT-PCR (Exon16) |
| ACTB-QF     | For | TCACCGAGCGCGGCT                          | QRT-PCR          |
| ACTB-QR     | Rev | TAATGTCACGCACGATTTCCC                    | QRT-PCR          |
| MYB-GSP1    | For | CTCCGCCTACAGCTCAACTC                     | 3'RACE (Exon6)   |
| MYB-GSP2    | For | GCCGCAGCCATTCAGAGACACTATAA               | 3'RACE (Exon7-8) |
| MYB-GSP3    | For | CTCAGACTTGAAATGCCTTC                     | 3'RACE (Exon11)  |
| MYB-GSP4    | For | GCAGGATGTGATCAAACAGG                     | 3'RACE (Exon13)  |
| AP          | Rev | GGCCACGCGTCGACTAGTACTTTTTTTTTTTTTTTTTTTT | 3'RACE           |
| AUAP        | Rev | GGCCACGCGTCGACTAGTAC                     | 3'RACE           |
| NFIB-AIG1-F | For | GCATGAGAAGCGAATGTCAA                     | RT-PCR           |
| NFIB-AIG1-R | Rev | TCCAAGGTCCAATTCTGGTT                     | RT-PCR           |

Note: Ori, Orientation; For, Forward; Rev, Reverse; AP, Adapter Primer; AUAP, Abridged Universal Amplification Primer.

Supplementary Table 2. Alternative breakpoint detected by FISH

| Case#  | Fusion Status        |                     |
|--------|----------------------|---------------------|
|        | RP11-378M4/NFIB (5') | RP11-55H4/NFIB (3') |
| 78-C8  | Positive             | Positive            |
| 124-C1 | Negative             | Positive            |
| 288-F7 | Negative             | Positive            |
| 405-B2 | Negative             | Positive            |
| 436-H3 | Negative             | Positive            |
| 471-F2 | Positive             | Positive            |
| 484-H3 | Negative             | Positive            |
| 485-F7 | Negative             | Positive            |
| 502-A5 | Positive             | Negative            |
| 526-B5 | Negative             | Positive            |
| 594-D3 | Negative             | Positive            |

FISH analysis used BAC clones of *MYB* (RP11-378M4 or RP11-55H4) and *NFIB* (RP11-79B9 and RP11-54D21) genes. All of these cases are *MYB-NFIB* transcript negative by RT-PCR and 3'RACE, but FISH positive (*MYB*; RP11-104D9) samples.

Supplementary Table 3. Summary of rearrangement patterns in 485F7 case

| <b>Rearrangement pattern</b> | <b><sup>a</sup>Chr</b> | <b><sup>b</sup>Pos</b> | <b><sup>a</sup>Chr</b> | <b><sup>b</sup>Pos</b> | <b>Size</b> | <b>Rearrangement consequence</b>                              |
|------------------------------|------------------------|------------------------|------------------------|------------------------|-------------|---------------------------------------------------------------|
| Translocation                | 6                      | 135403192              | 9                      | 14213172               | N/A         | Breaks <i>NFIB</i> intron 7,<br>Breaks upstream of <i>MYB</i> |
| Translocation                | 6                      | 143599570              | 9                      | 14212301               | N/A         | Breaks <i>NFIB</i> intron 7,<br>Breaks <i>AIG1</i> intron 2   |
| Inverted orientation         | 6                      | 143599106              | 6                      | 145105794              | 1506688     | Breaks <i>AIG1</i> intron2,<br>Breaks <i>UTRN</i> intron 11   |
| Intrachromosomal             | 6                      | 135316882              | 6                      | 145106331              | 9789449     | Breaks <i>HBSIL</i> intron 7,<br>Breaks <i>UTRN</i> intron 60 |
| Inversion                    | 6                      | 55851114               | 6                      | 146674745              | 90823631    | Breaks <i>GRM1</i> intron 4                                   |
| Inversion                    | 6                      | 55851947               | 6                      | 146675822              | 90823875    | Breaks <i>GRM1</i> intron 4                                   |
| Intrachromosomal             | 3                      | 75755145               | 3                      | 197845654              | 122090509   | Breaks no annotated genes                                     |
| Deletion                     | 4                      | 35374876               | 4                      | 35412355               | 37479       | Breaks no annotated genes                                     |
| Intrachromosomal             | 4                      | 83621546               | 4                      | 176884816              | 93263270    | Breaks <i>SCD5</i> intron 2,<br>Breaks <i>GPM6A</i> 5' UTR    |
| Intrachromosomal             | 11                     | 47349411               | 11                     | 48359707               | 1010296     | Breaks <i>MADD</i> intron 33                                  |
| Intrachromosomal             | 13                     | 23487983               | 13                     | 24901910               | 1413927     | Breaks no annotated genes                                     |
| Intrachromosomal             | 14                     | 48690021               | 14                     | 49436046               | 746025      | No annotated genes in deletion                                |
| Deletion                     | 16                     | 79260215               | 16                     | 79280247               | 20032       | No annotated genes in deletion                                |
| Inverted orientation         | 19                     | 15819768               | 19                     | 16018350               | 198582      | Breaks no annotated genes                                     |

<sup>a</sup>Chr, Chromosome location. <sup>b</sup>Pos, break position

Supplementary Table 4. Correlation between Clinicopathologic and fusion gene status and *MYB* expression in ACC

| Factor                     | number | <i>MYB</i> exon 2-3 |                      | <i>MYB</i> exon 15-16 |                      |
|----------------------------|--------|---------------------|----------------------|-----------------------|----------------------|
|                            |        | Mean ± SE           | <sup>a</sup> p-value | Mean ± SE             | <sup>a</sup> p-value |
| <b>Fusion transcript</b>   |        |                     |                      |                       |                      |
| positive                   | 39     | 605.2 ± 105.2       |                      | 12.7 ± 2.8            |                      |
| negative                   | 63     | 239.7 ± 41.2        | < 0.001              | 132.4 ± 22.3          | 0.003                |
| <b>FISH</b>                |        |                     |                      |                       |                      |
| positive                   | 54     | 519.7 ± 93.1        |                      | 63.1 ± 18.3           |                      |
| negative                   | 48     | 221.7 ± 51.9        | < 0.001              | 113.1 ± 26.3          | 0.50                 |
| <b>Age</b>                 |        |                     |                      |                       |                      |
| <60                        | 67     | 447.3 ± 70.0        |                      | 90.6 ± 19.1           |                      |
| ≥60                        | 35     | 249.6 ± 55.8        | 0.044                | 79.2 ± 24.5           | 0.95                 |
| <b>Gender</b>              |        |                     |                      |                       |                      |
| Male                       | 61     | 435.0 ± 74.8        |                      | 89.9 ± 18.8           |                      |
| Female                     | 41     | 296.9 ± 56.8        | 0.18                 | 81.9 ± 24.9           | 0.22                 |
| <b>Size</b>                |        |                     |                      |                       |                      |
| <4cm                       | 63     | 373.0 ± 64.2        |                      | 99.1 ± 20.8           |                      |
| ≥4cm                       | 35     | 426.8 ± 89.9        | 0.46                 | 73.7 ± 22.4           | 0.98                 |
| <b>Pattern<sup>b</sup></b> |        |                     |                      |                       |                      |
| T/C                        | 60     | 377.9 ± 75.8        |                      | 91.5 ± 20.4           |                      |
| S                          | 41     | 357.6 ± 54.9        | 0.26                 | 81.6 ± 22.6           | 0.79                 |
| <b>Stage<sup>c</sup></b>   |        |                     |                      |                       |                      |
| I-II                       | 20     | 399.1 ± 147.1       |                      | 63.7 ± 24.9           |                      |
| III-IV                     | 35     | 343.1 ± 80.7        | 0.55                 | 109.9 ± 28.7          | 0.12                 |
| <b>PNI<sup>d</sup></b>     |        |                     |                      |                       |                      |
| Yes                        | 78     | 369.3 ± 51.4        |                      | 83.9 ± 15.8           |                      |
| No                         | 7      | 554.6 ± 348.8       | 0.80                 | 47.0 ± 26.1           | 0.94                 |
| <b>Metastasis</b>          |        |                     |                      |                       |                      |
| Yes                        | 52     | 477.5 ± 86.9        |                      | 76.5 ± 20.0           |                      |
| No                         | 50     | 277.5 ± 46.1        | 0.12                 | 97.2 ± 22.6           | 0.98                 |

<sup>a</sup>Mann-Whitney U test. <sup>b</sup>T/C, tubular/cribriform; S, solid pattern; <sup>c</sup>55 patients are available for the staging analysis. <sup>d</sup>PNI, Perineural invasion.
